# Supplementary material
Source: Springer Nature journal article supplement (https://www.springermedizin.de/resource/supplementary/12950_2012_272_MOESM9_ESM.pdf/9558332)

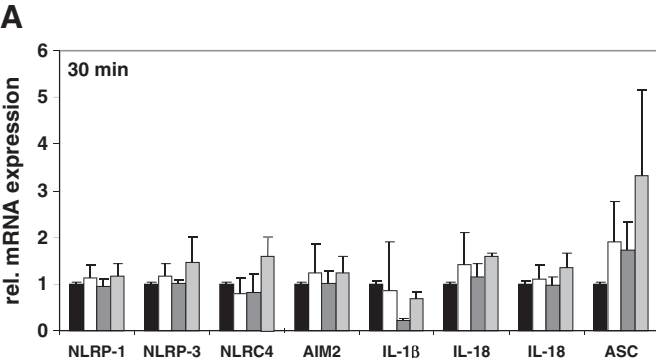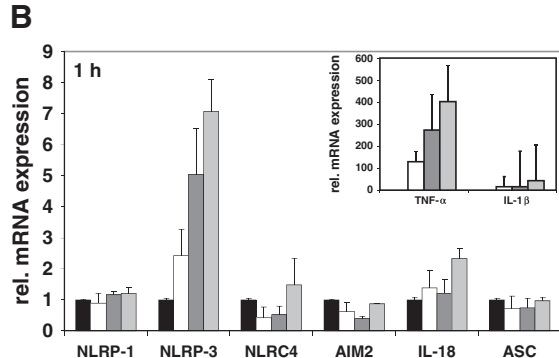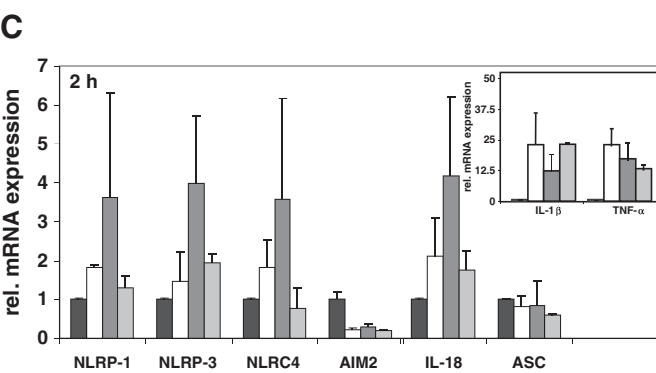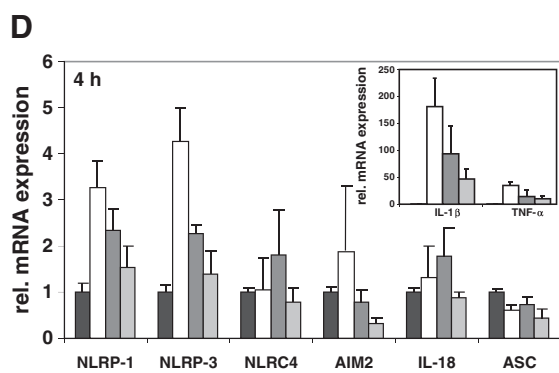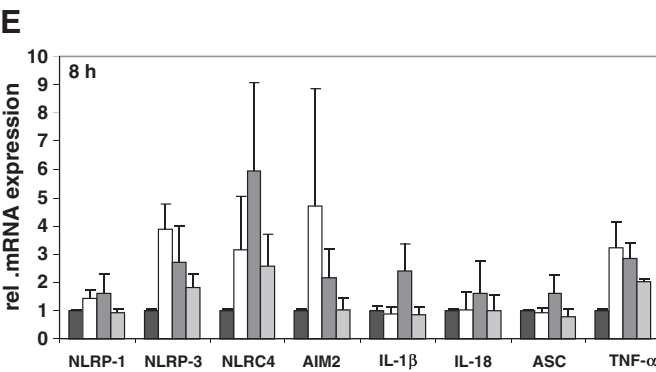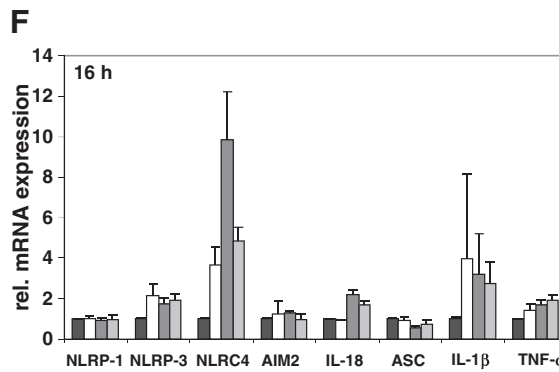

0 ng LPS/ml 50 ng LPS/ml 100 ng LPS/ml 200 ng LPS/ml

Supplement: MOESM9 [file 9558332]
